# Supplementary material
Source: publisher figshare collection journal article supplement (https://gsapubs.figshare.com/ndownloader/files/23320688)
Supplement: Supplementary file 1 [file 23320688]

## Sheet: PlotDat5
Source sheet	Sheet1	0.3	660.982	1	660.616	0.408088
Plot name	Average4	5.7	660.982	2	660.757	0.477798
Plot Type	15			3	660.896	0.39035
1st free col	8			4	661.113	0.592181
Sigma Level	2			5	661.262	0.287261
Absolute Errs	TRUE			IsoLine	IsoLine	IsoLine	IsoLine
Symbol Type	1
Inverse Plot	FALSE
Color Plot	TRUE
3D plot	FALSE
Linear	FALSE
Data Range	Y66:Z70
Filled Symbols	FALSE
ConcAge	FALSE
ConcSwap	FALSE
1st Symbol-row	1

## Sheet: Sheet1
Table DR1: U-Th-Pb isotopic data
		Compositional Parameters									Radiogenic Isotope Ratios									Isotopic Ages
	Wt.	U	Th	Pb	206Pb*	mol %	Pb*	Pbc	206Pb		208Pb	207Pb		207Pb		206Pb		corr.		207Pb		207Pb		206Pb
Sample	mg	ppm	U	ppm	x10-13 mol	206Pb*	Pbc	(pg)	204Pb		206Pb	206Pb	% err	235U	% err	238U	% err	coef.		206Pb	±	235U	±	238U	±
(a)	(b)	(c)	(d)	(c)	(e)	(e)	(e)	(e)	(f)		(g)	(g)	(h)	(g)	(h)	(g)	(h)			(i)	(h)	(i)	(h)	(i)	(h)
FDM14-11 GPS: 28°34'27.1"N 109°54'29.1"E
z5	0.01	30.8423	0.868306	4.46006	1.38724	0.94759	5.92054	6.44536	337.567		0.270467	0.0619625	0.407407	0.921302	0.454383	0.107838	0.14961	0.462388		672.577	8.71455	663.048	2.21237	660.249	0.938801
z10	0.01	53.2717	0.623478	6.45496	2.40305	0.988632	26.8623	2.31695	1562.84		0.193436	0.0616944	0.0740993	0.919988	0.101873	0.108152	0.0581042	0.69802		663.268	1.58744	662.354	0.495647	662.085	0.365562
z3	0.01	12.1259	0.54918	1.68772	0.553743	0.941942	4.89473	2.86337	305.634		0.166643	0.0601375	0.710389	0.907839	0.772197	0.109487	0.168226	0.461634		608.254	15.3586	655.908	3.731	669.848	1.07016
z2	0.01	8.29926	0.698293	1.09001	0.381023	0.973832	11.7617	0.85417	686.707		0.215883	0.0617729	0.288257	0.937517	0.387336	0.110073	0.2275	0.673485		666.004	6.17258	671.582	1.90306	673.246	1.45422
z4	0.01	18.1368	0.909929	2.62215	0.832896	0.940589	4.9368	4.41723	298.113		0.222995	0.045619	0.409245	0.692542	0.429434	0.110103	0.129469	0.303019		-22.7588	9.90689	534.326	1.78416	673.42	0.827787
z11	0.01	59.0933	0.717033	8.55678	2.97414	0.97441	12.0422	6.56156	691.321		0.222883	0.0643429	0.700651	1.07052	1.00387	0.120668	0.456764	0.791087		752.696	14.7923	738.993	5.27014	734.48	3.17048
z6	0.01	52.8156	1.09794	8.25121	2.80462	0.994848	66.9427	1.21452	3469.5		0.338692	0.0650151	0.0609657	1.14129	0.18616	0.127315	0.168643	0.945692		774.648	1.28258	773.119	1.00748	772.591	1.22778
z9	0.01	15.3326	1.42384	2.81636	0.826259	0.964939	10.1866	2.51786	506.475		0.437342	0.0650094	0.283757	1.1581	0.336662	0.129202	0.150552	0.547389		774.497	5.96979	781.062	1.83442	783.362	1.11046
z7	0.01	51.908	0.522283	7.5127	2.88465	0.99137	34.6967	2.10478	2060.21		0.160956	0.0661512	0.0814057	1.21525	0.133986	0.133238	0.092988	0.801508		810.943	1.70264	807.6	0.746331	806.388	0.704775
FDM14-12 GPS: 28°34'27.1"N 109°54'29.1"E
z2	0.01	42.5541	1.54381	6.14194	1.9153	0.997284	140.953	0.432673	6702.1		0.479258	0.0616971	0.0461845	0.917972	0.133854	0.10791	0.120037	0.939564		663.465	0.989401	661.287	0.650502	660.648	0.753686
z4	0.01	16.3119	2.28801	2.77677	0.737037	0.987318	34.182	0.789292	1419.06		0.708371	0.0615552	0.144629	0.919428	0.184165	0.108331	0.096591	0.627623		658.612	3.10088	662.057	0.895743	663.07	0.608607
z5	0.01	9.70783	2.17067	1.88463	0.449188	0.931844	5.83897	2.75598	260.408		0.670443	0.0618609	0.40248	0.946218	0.426384	0.110936	0.128295	0.33154		669.212	8.61417	676.132	2.1049	678.211	0.825871
z1	0.01	19.4679	1.2846	2.76286	0.900987	0.993011	51.4841	0.526421	2600.2		0.394808	0.0614547	0.103907	0.940207	0.162349	0.11096	0.116199	0.770287		655	2.2291	672.991	0.798831	678.378	0.748152
FDM14-13 GPS: 28°34'27.1"N 109°54'29.1"E
z11	0.01	8.76691	1.15237	1.21271	0.393404	0.982164	19.418	0.593955	1015.47		0.357863	0.0616631	0.257755	0.914717	0.287251	0.107587	0.0834696	0.480516		662.238	5.52291	659.562	1.39339	658.779	0.522671
z3	0.01	16.0581	1.16921	2.27965	0.720621	0.97414	13.2321	1.6019	689.074		0.362568	0.0615446	0.155633	0.913004	0.174494	0.107592	0.0605026	0.468256		658.118	3.33701	658.653	0.845604	658.81	0.378873
z4	0.01	7.81503	1.1962	1.20788	0.350714	0.945053	6.07275	1.70793	324.114		0.370352	0.0614152	0.344066	0.911103	0.369681	0.107595	0.0988502	0.383846		653.605	7.38283	657.644	1.78953	658.822	0.619021
z12	0.01	15.3812	1.35416	2.13112	0.69036	0.996941	120.269	0.175736	5949.75		0.420342	0.0616309	0.109597	0.914438	0.18811	0.107611	0.0919158	0.920234		661.14	2.34877	659.414	0.912334	658.91	0.575673
z21	0.01	17.3063	1.73609	2.60242	0.777353	0.995176	82.2417	0.312635	3772.54		0.538675	0.0616124	0.161201	0.914854	0.231725	0.107692	0.106706	0.790589		660.543	3.45505	659.635	1.12414	659.369	0.668761
z14	0.01	9.94592	1.24231	1.39001	0.44686	0.985567	24.5754	0.5435	1257.87		0.385481	0.0616214	0.234644	0.915223	0.304722	0.107719	0.100628	0.781447		660.797	5.02891	659.83	1.47857	659.547	0.630813
z13	0.01	20.0166	1.42129	2.8489	0.905852	0.994802	71.549	0.392687	3501.28		0.439734	0.0615318	0.132127	0.920526	0.207825	0.108501	0.0937405	0.88599		657.7	2.83322	662.638	1.01145	664.09	0.591486
FDM14-14 GPS: 28°33'49.9"N 109°53'40.4"E
z8	0.01	16.1265	0.575478	1.88776	0.720497	0.992556	41.1078	0.448317	2444.81		0.178382	0.0614202	0.167715	0.907136	0.280179	0.107117	0.175439	0.82547		653.709	3.59866	655.534	1.35318	656.065	1.09423
z3	0.01	28.1502	0.505829	3.21032	1.25951	0.995768	71.2961	0.444052	4300.92		0.15698	0.0615479	0.126867	0.910337	0.203599	0.107272	0.0977589	0.877081		658.157	2.72018	657.237	0.985141	656.969	0.610531
z2	0.01	19.9636	0.598258	2.46397	0.893364	0.978386	13.9088	1.65283	824.204		0.1856	0.0615227	0.226896	0.910114	0.299316	0.10729	0.106241	0.776666		657.292	4.86562	657.118	1.44809	657.068	0.6636
z18	0.01	34.0549	0.547266	4.25216	1.52437	0.971164	10.193	3.79933	614.563		0.169794	0.0615351	0.25704	0.910547	0.33317	0.107319	0.121433	0.737542		657.714	5.51165	657.349	1.61228	657.242	0.758684
z17	0.01	10.0794	0.640831	1.20522	0.451196	0.991707	37.5048	0.313005	2194.74		0.199223	0.0617015	0.194726	0.913051	0.260582	0.107324	0.0983749	0.773612		663.515	4.17145	658.678	1.26283	657.267	0.614647
z12	0.01	13.5493	0.552321	1.57172	0.606638	0.994366	54.1207	0.285141	3230.55		0.171476	0.0615945	0.160951	0.91164	0.23309	0.107345	0.107234	0.798653		659.785	3.45004	657.929	1.12868	657.388	0.670116
z23	0.01	8.26551	0.632509	1.20206	0.370425	0.928157	4.00001	2.40433	247.245		0.196502	0.0616692	1.172	0.913626	1.30036	0.107448	0.160591	0.821641		662.392	25.1115	658.983	6.30386	657.988	1.00442
z13	0.01	11.9555	1.60431	1.87685	0.538027	0.969347	12.1818	1.42392	582.027		0.49825	0.0617289	0.304583	0.918324	0.377647	0.107896	0.121501	0.704041		664.573	6.52381	661.473	1.83565	660.563	0.762791
z21	0.01	9.34024	0.689865	1.15357	0.420499	0.986786	23.6933	0.467159	1377.3		0.213948	0.0616204	0.306235	0.917066	0.368033	0.107938	0.125962	0.620549		660.7	6.56329	660.807	1.78764	660.838	0.791072
FDM14-19 GPS: 28°09'37.7"N 108°55'02.6"E
z5	0.01	35.4262	1.52152	5.09538	1.59492	0.996974	125.882	0.401583	6014.98		0.472239	0.0616856	0.0735976	0.918056	0.25766	0.10794	0.243101	0.958454		663.064	1.57677	661.331	1.25223	660.824	1.52677
z3	0.01	4.89846	1.14583	0.79989	0.221675	0.924528	4.28041	1.51494	236.238		0.354758	0.0615897	0.547458	0.921374	0.594496	0.108499	0.157706	0.4191		659.688	11.7353	663.086	2.89469	664.086	0.995077
FDM14-22 GPS: 27°58'25.4"N 108°49'50.3"E
z5	0.01	19.8109	0.982333	3.16782	1.10058	0.993786	54.3499	0.572335	2912.35		0.302757	0.0661497	0.174684	1.21483	0.484005	0.133194	0.435063	0.933232		810.936	3.65363	807.406	2.69559	806.126	3.29649
z1	0.01	10.9393	1.09237	1.89138	0.609646	0.975928	13.9789	1.26279	735.694		0.336021	0.066056	0.304033	1.21694	0.416528	0.133615	0.250977	0.688974		807.982	6.36206	808.376	2.32161	808.518	1.90697
z4	0.01	16.9178	0.799691	2.79548	0.96233	0.976803	13.5274	1.92444	758.768		0.244491	0.0660553	0.407782	1.2421	0.485448	0.136379	0.179123	0.583401		807.939	8.5331	819.834	2.7307	824.226	1.38578
FDM14-23 GPS: 27°58'25.4"N 108°49'50.3"E
z2	0.01	21.884	1.1741	2.45745	0.77949	0.985876	25.2791	0.935184	1261.72		0.402767	0.065351	0.13061	0.769496	0.250479	0.085399	0.203469	0.85432		785.423	2.74296	579.474	1.10601	528.326	1.032
z4	0.01	21.6295	0.769897	3.81104	1.20768	0.947574	5.75041	5.64624	333.146		0.236505	0.0659811	0.358288	1.21786	0.414745	0.133868	0.173014	0.512684		805.582	7.50024	808.795	2.31246	809.964	1.31678
z3	0.01	21.9061	0.868696	3.50056	1.23384	0.989925	32.2498	1.05287	1764.02		0.266851	0.0662241	0.12505	1.23304	0.188631	0.13504	0.117338	0.761565		813.279	2.61454	815.723	1.05761	816.62	0.899928
FDM14-24 GPS: 27°58'10.9"N 108°50'15.4"E
z1	0.01	29.9755	0.48754	3.75071	1.37201	0.973343	10.8923	3.1542	664.798		0.151631	0.0622065	0.333208	0.941231	0.387649	0.109739	0.141055	0.540793		680.942	7.11757	673.526	1.90848	671.311	0.899178
z4	0.01	24.6299	1.16852	4.16185	1.36606	0.98797	28.8939	1.39231	1482.55		0.359807	0.0660171	0.210733	1.21041	0.255235	0.132976	0.107014	0.589235		806.755	4.41058	805.378	1.41915	804.88	0.809678
z5	0.01	3.40942	1.71714	0.676242	0.195141	0.978088	17.6455	0.362684	830.604		0.521265	0.0655611	0.470318	1.24046	0.530808	0.137226	0.148613	0.523825		792.282	9.86654	819.09	2.9841	828.997	1.15602
17GZGZ01 GPS: 27°58'10.9"N 108°50'15.4"E
z5	0.01	15.1	1.07931	2.00942	0.678929	0.99077	37.271	0.525053	1968.99		0.334331	0.0614959	0.140857	0.914036	0.390268	0.107799	0.358407	0.932705		656.409	3.02104	659.201	1.89237	660.018	2.24828
z9	0.01	14.6089	1.49577	2.66099	0.657423	0.903839	3.52982	5.87501	184.025		0.464712	0.0617592	0.453095	0.918751	0.473561	0.107893	0.223782	0.325753		665.61	9.70311	661.699	2.30242	660.552	1.40488
z18	0.01	6.04531	0.750288	0.750771	0.272065	0.989088	29.1498	0.249014	1667.89		0.231546	0.0612093	0.204582	0.910629	0.231486	0.1079	0.0649999	0.530244		646.345	4.39509	657.392	1.12026	660.616	0.408088
z7	0.01	4.41693	1.02843	0.592685	0.198828	0.983474	20.3825	0.277182	1101.29		0.315452	0.060717	0.383464	0.90352	0.434269	0.107926	0.0760871	0.71626		629	8.26189	653.607	2.093	660.757	0.477798
z24	0.01	15.4785	1.0654	2.07706	0.696923	0.987377	26.9766	0.742453	1427.38		0.330153	0.0615581	0.26382	0.916241	0.304642	0.10795	0.0621488	0.71485		658.576	5.65627	660.37	1.47904	660.896	0.39035
z25	0.01	4.39582	2.22737	0.754699	0.198003	0.976857	18.3923	0.389175	786.408		0.686927	0.0611724	0.358635	0.910869	0.404212	0.107994	0.0942484	0.572895		645.211	7.70631	657.52	1.95643	661.113	0.592181
z4	0.01	28.4971	1.05306	3.71245	1.28383	0.996917	111.717	0.329359	5903.8		0.326393	0.0615857	0.0580424	0.917186	0.0791084	0.108013	0.0457116	0.688404		659.538	1.24422	660.871	0.384278	661.262	0.287261
z11	0.01	3.4708	1.10178	0.491975	0.158062	0.973873	12.9844	0.351804	696.592		0.338415	0.0610673	0.567754	0.919342	0.620617	0.109186	0.131811	0.49017		641.392	12.2073	662.012	3.01841	668.082	0.836434
z26	0.01	3.02003	0.597078	0.470073	0.170274	0.978018	13.8055	0.3175	827.961		0.182108	0.0655816	0.387491	1.22233	0.444528	0.135178	0.138887	0.540548		792.84	8.12809	810.841	2.48262	817.413	1.06616
(a) z1, z2 etc. are labels for fractions composed of single zircon grains or fragments; all fractions annealed and chemically abraded after Mattinson (2005).
(b) Nominal fraction weights estimated from photomicrographic grain dimensions, adjusted for partial dissolution during chemical abrasion.
(c) Nominal U and total Pb concentrations subject to uncertainty in photomicrographic estimation of weight and partial dissolution during chemical abrasion.
(d) Model Th/U ratio calculated from radiogenic 208Pb/206Pb ratio and 207Pb/235U age.
(e) Pb* and Pbc represent radiogenic and common Pb, respectively; mol % 206Pb* with respect to radiogenic, blank and initial common Pb.
(f) Measured ratio corrected for spike and fractionation only.
Daly analyses, based on analysis of NBS-981 and NBS-982.
(g) Corrected for fractionation, spike, and common Pb; up to 1 pg of common Pb was assumed to be procedural blank: 206Pb/204Pb = 18.60 ± 0.80%; 207Pb/204Pb = 15.69 ± 0.32%;
208Pb/204Pb = 38.51 ± 0.74% (all uncertainties 1-sigma). Excess over blank was assigned to initial common Pb.
(h) Errors are 2-sigma.
(i) Calculations are based on the decay constants of Jaffey et al. (1971). 206Pb/238U and 207Pb/206Pb ages corrected for initial disequilibrium in 230Th/238U using Th/U [magma] = 3.
